# Supplementary material for: Extubation generates lung volume inhomogeneity in preterm infants
Source: medRxiv preprint, doi:10.1101/2021.02.03.21251050, version 1 (2021-02-05)
Supplement: Online Supplementary Table 1 [file 251050_file04.docx]

**Extubation generates lung volume inhomogeneity in preterm infants**

Bhatia R, Carlisle HR, Armstrong RK, Kamlin COF, Davis PG, Tingay DG

**Supplementary Material**

63 eligible infants <32 weeks’ GA

30 studied as part of original study

227 eligible infants <32 weeks’ GA

2 excluded (EIT artefact)

12 consent to study at extubation

10 included in analysis

2 excluded (1 unplanned extubation, 1 HFOV)

30 infants included in final dataset

22 consent obtained

20 included in analysis

137 not approached

68 declined consent

Study 1 (Ref #10)

Study 2 (Ref #12)

**Supplementary Figure 1.** Study flow chart
